# Supplementary material for: Continuous and large-scale synthesis of Ni–Co PBA nanoparticles with a tunable particle size in a microreactor
Source: Royal Society of Chemistry journal article supplement (doi:10.1039/d2nj04385h), 2022-11-18
Supplement: d2nj04385h1.pdf [file d2nj04385h1.pdf]

# **Continuous and large-scale synthesis of Ni-Co PBA nanoparticles with tunable particle size by microreactor**

Huanhuan Wang, Qi Qu, Zhiming Liu, Yan He\*, Jiangshan Gao\*

College of Electromechanical Engineering, Shandong Engineering Laboratory  
for Preparation and Application of High-performance Carbon Materials, Qingdao  
University of Science and Technology, Qingdao 266061, China

Co-Corresponding author: Yan He, Email: [heyan@qust.edu.cn](mailto:heyan@qust.edu.cn)

Jiangshan Gao, Email: [gaojs@qust.edu.cn](mailto:gaojs@qust.edu.cn)

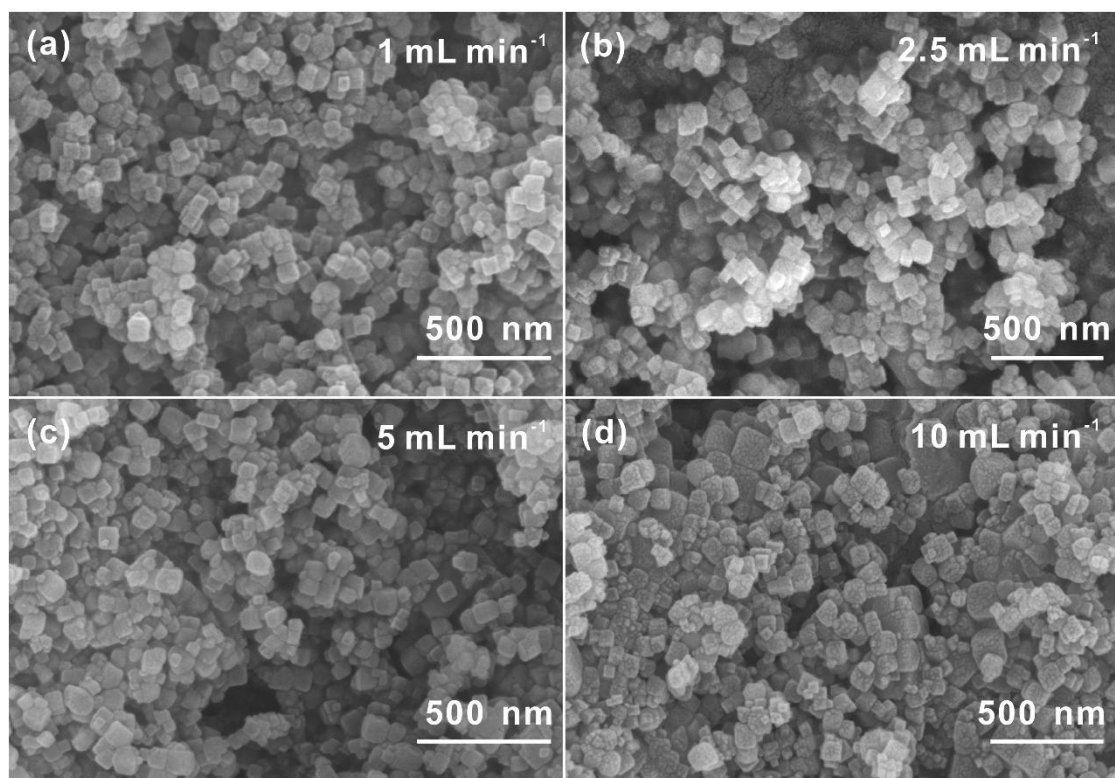

**Figure S1.** SEM images of Ni-Co PBA-4# nanoparticles. Ni-Co PBA nanoparticles obtained at feed flow rates of (a) 1 mL min<sup>-1</sup>, (b) 2.5 mL min<sup>-1</sup>, (c) 5 mL min<sup>-1</sup>, (d) 10 mL min<sup>-1</sup>.

**Table S1**

Different parameters for the preparation of Ni-Co PBA nanoparticles in the stirring-mix method.

| Compounds    | Amount of substance (mmol)                           |                                                                                 |                                       | T<br>(°C) |
|--------------|------------------------------------------------------|---------------------------------------------------------------------------------|---------------------------------------|-----------|
|              | A                                                    |                                                                                 | B                                     |           |
|              | Ni(NO <sub>3</sub> ) <sub>2</sub> ·6H <sub>2</sub> O | Na <sub>3</sub> C <sub>6</sub> H <sub>5</sub> O <sub>7</sub> ·2H <sub>2</sub> O | K <sub>3</sub> [Co(CN) <sub>6</sub> ] |           |
| Ni-Co PBA-1# | 1.8                                                  | 2.7                                                                             | 1.2                                   | 25        |
| Ni-Co PBA-2# | 3.6                                                  | 5.4                                                                             | 2.4                                   | 25        |
| Ni-Co PBA-3# | 5.4                                                  | 8.1                                                                             | 3.6                                   | 25        |
| Ni-Co PBA-4# | 7.2                                                  | 10.8                                                                            | 4.8                                   | 25        |

**Table S2**

Different parameters for the preparation of Ni-Co PBA nanoparticles in the continuous flow microreactor.

| Compounds       | Amount of substance (mmol)                                                                                                              |                                       | Pressure (MPa) | Flow rate (mL min <sup>-1</sup> ) | Residence time (min) |      |
|-----------------|-----------------------------------------------------------------------------------------------------------------------------------------|---------------------------------------|----------------|-----------------------------------|----------------------|------|
|                 | A                                                                                                                                       | B                                     |                |                                   |                      |      |
|                 | Ni(NO <sub>3</sub> ) <sub>2</sub> ·6H <sub>2</sub> O<br>Na <sub>3</sub> C <sub>6</sub> H <sub>5</sub> O <sub>7</sub> ·2H <sub>2</sub> O | K <sub>3</sub> [Co(CN) <sub>6</sub> ] |                |                                   |                      |      |
| Ni-Co PBA-1#-2  | 1.8                                                                                                                                     | 2.7                                   | 1.2            | 0.39                              | 2                    | 30   |
| Ni-Co PBA-1#-4  | 1.8                                                                                                                                     | 2.7                                   | 1.2            | 0.38                              | 4                    | 15   |
| Ni-Co PBA-1#-6  | 1.8                                                                                                                                     | 2.7                                   | 1.2            | 0.37                              | 6                    | 10   |
| Ni-Co PBA-1#-8  | 1.8                                                                                                                                     | 2.7                                   | 1.2            | 0.34                              | 8                    | 7.5  |
| Ni-Co PBA-1#-10 | 1.8                                                                                                                                     | 2.7                                   | 1.2            | 0.37                              | 10                   | 6    |
| Ni-Co PBA-1#-12 | 1.8                                                                                                                                     | 2.7                                   | 1.2            | 0.57                              | 12                   | 5    |
| Ni-Co PBA-1#-14 | 1.8                                                                                                                                     | 2.7                                   | 1.2            | 0.59                              | 14                   | 4.3  |
| Ni-Co PBA-1#-16 | 1.8                                                                                                                                     | 2.7                                   | 1.2            | 0.62                              | 16                   | 3.75 |
| Ni-Co PBA-2#-2  | 3.6                                                                                                                                     | 5.4                                   | 2.4            | 0.82                              | 2                    | 30   |
| Ni-Co PBA-2#-4  | 3.6                                                                                                                                     | 5.4                                   | 2.4            | 0.41                              | 4                    | 15   |
| Ni-Co PBA-2#-6  | 3.6                                                                                                                                     | 5.4                                   | 2.4            | 0.43                              | 6                    | 10   |
| Ni-Co PBA-2#-8  | 3.6                                                                                                                                     | 5.4                                   | 2.4            | 0.46                              | 8                    | 7.5  |
| Ni-Co PBA-2#-10 | 3.6                                                                                                                                     | 5.4                                   | 2.4            | 0.53                              | 10                   | 6    |
| Ni-Co PBA-2#-12 | 3.6                                                                                                                                     | 5.4                                   | 2.4            | 0.57                              | 12                   | 5    |
| Ni-Co PBA-2#-14 | 3.6                                                                                                                                     | 5.4                                   | 2.4            | 0.63                              | 14                   | 4.3  |
| Ni-Co PBA-2#-16 | 3.6                                                                                                                                     | 5.4                                   | 2.4            | 0.87                              | 16                   | 3.75 |
| Ni-Co PBA-3#-2  | 5.4                                                                                                                                     | 8.1                                   | 3.6            | 0.36                              | 2                    | 30   |
| Ni-Co PBA-3#-4  | 5.4                                                                                                                                     | 8.1                                   | 3.6            | 0.37                              | 4                    | 15   |
| Ni-Co PBA-3#-6  | 5.4                                                                                                                                     | 8.1                                   | 3.6            | 0.41                              | 6                    | 10   |
| Ni-Co PBA-3#-8  | 5.4                                                                                                                                     | 8.1                                   | 3.6            | 0.36                              | 8                    | 7.5  |
| Ni-Co PBA-3#-10 | 5.4                                                                                                                                     | 8.1                                   | 3.6            | 0.44                              | 10                   | 6    |
| Ni-Co PBA-3#-12 | 5.4                                                                                                                                     | 8.1                                   | 3.6            | 0.58                              | 12                   | 5    |
| Ni-Co PBA-3#-14 | 5.4                                                                                                                                     | 8.1                                   | 3.6            | 0.71                              | 14                   | 4.3  |
| Ni-Co PBA-3#-16 | 5.4                                                                                                                                     | 8.1                                   | 3.6            | 0.97                              | 16                   | 3.75 |
